# Supplementary material for: N-Acetylcysteine Administration Attenuates Sensorimotor Impairments Following Neonatal Hypoxic-Ischemic Brain Injury in Rats
Source: MDPI journal article supplement (doi:10.3390/ijms232416175), 2022-12-19
Supplement: s1 [file s1]

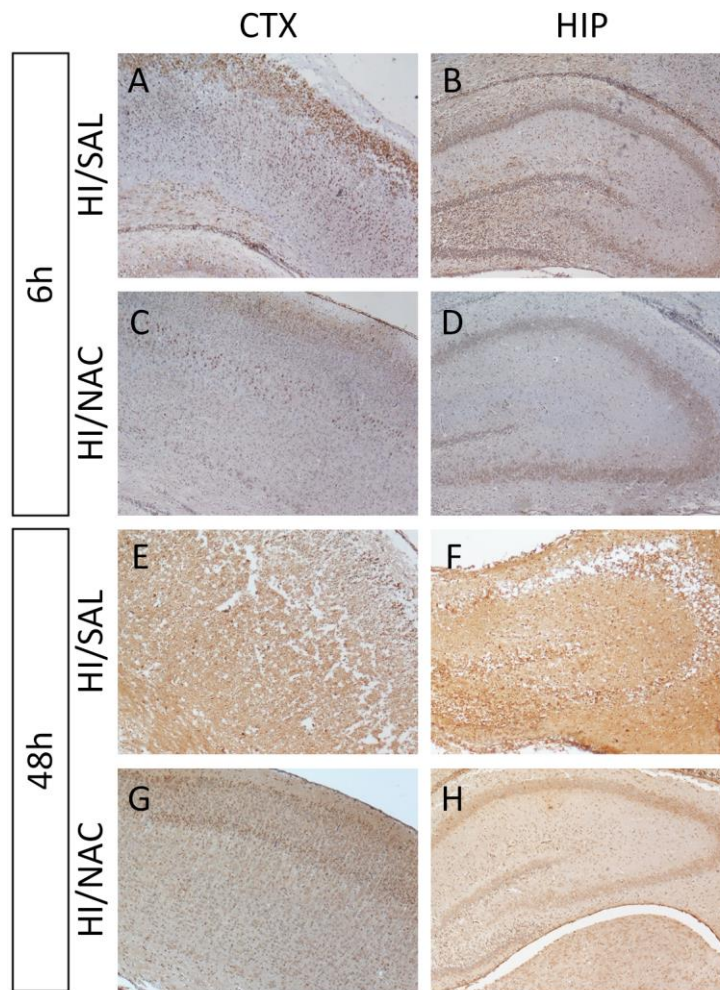

**Figure S1.** Brain images from which the representative photos were used in Figure 5 in the manuscript. Immunohistochemical staining for iNOS expression (DAB-brown staining) in the cortex-CTX (A,C,E,G) and hippocampus-HIP (B, D, F, H) from each group at 6h and 48h following neonatal HI. Lower levels of iNOS expression are observed both in CTX and HIP in NAC/HI group compared to the HI/SAL. Regions with extensive damage appeared to have diminished iNOS expression due to neuronal loss.
